# Supplementary material for: Structure and Phylogeny of the Curly Birch Chloroplast Genome
Source: Front Genet. 2021 Oct 4;12:625764. doi: 10.3389/fgene.2021.625764 (PMC8521055; doi:10.3389/fgene.2021.625764)
Supplement: Supplementary Table 1 — The PCR primers for cpDNA curly birch microsatellite (cpSSR) loci. [file Data_Sheet_1.xlsx]

## Sheet: Supplementary_Table_S1
Supplementary Table S1. The PCR primers for cpDNA curly birch microsatellite (cpSSR) loci.
№		Location in the annotated cpDNA genome		Nucleotide sequnce of PCR primers		Expected length
	Type of sequence motif	beginning at position	ending at position	Forward	Reverse	bp
1	(T) 7	261	267	TAAACAATGGAATCGCCCAT	ATTTCTTTTCCATCACTTTGACAT	123
2	(A) 7	446	589	ACTATAAACAATGGAATCGC	AAAATATATAGGGGGTGGC	345
3	(A)8	1125	1203	TCTTAATACCAAAATGCGTA	ATTCAATATCTCTATGGGG	198
4	(T)9	2727	2761	TTAACTGTTTCTGATTCACC	TTTTTCAATAGTAGCTTGGT	202
5	(T)9	2912	2920	GAGATGACCAAGCTACTATTGA	GCTTAATTAGTCAAACGCGAA	141
6	(A)8	3025	3032	ACTACGAGTCTCATTTGAATTTG	ACCAAAGTGGTTGTTCCTTT	183
7	(T)7	3142	3148	ATAAAGGAACAACCACTTTG	ACATCTATTGTTCAAAACCA	159
8	(A)7	3323	3350	AGATGTCTTTCACATCCAACTAT	TTCAATGCTACCCAATACCC	141
9	(A)7	3513	3519	ACATTGGAATAGTCTGAATC	AGAAACGAAATTAAAAGAAAC	77
10	(T)8	3851	3872	TCCTTAATGTTTTGAATGGA	TACTAAAAGACAGCTGAAAC	162
11	(A)9	4064	4072	ATCCAAATTAATGAGTTGTTG	ATAAAAACTTCTTGTCCCAT	173
12	(T)11	4503	4527	TTGTGATCGATAAAAATCCT	AATTGATGAATCAAAACTCG	213
13	(T)7	4976	4982	CTATAATTTCGAGAATCCCC	TCCTGTTATACAGACAAAAG	207
14	(A)9	5255	5263	TTTTCTTTCATGGAGTTTGTCC	GTAGCAAAGCCTTGGGTAAA	114
15	(T)7	6086	6158	AAGGTTCTTACAAAGGCCAA	TCAAAAATCAAACAGCAATCCT	187
16	(A)7	6380	6386	GAAACAAATAACTCTCGCGG	ACGCCAAATGTTCTATGGAT	84
17	(A)8	6510	6517	ATCCATAGAACATTTGGCGTA	GATGAGTGGTTTTGTTGCAG	161
18	(A)7	6705	6711	TGAATATTTTTGGAACCGGGA	GTGATATGGGCCTCAATGG	159
19	(T)8	6835	6842	CATTGAGGCCCATATCACTT	CTATTTGCTCCCTGGTTGAT	166
20	(А)7	7212	7338	CGATACCCAGAACTCCGATT	ATGTTAGCAATGTATAGCGG	205
21	(A)7	7523	7529	TCCTGTCAGCAAAATAGGTC	TTAATGCAATTGACGGAGGA	102
22	(A)10	7787	7844	CTTTGACCAGAAAAATCCGTG	TTTCACAAATCCCACCTGAA	112
23	(A)7	8532	8538	TTTCCTTTCAATTGGCGACT	GCCCTTATGTGTCTTGAACT	92
24	(A)7	8986	8992	ACAGCAATTGCACCTATCAA	CGTCATGGTACGGGATTATT	166
25	(T)7	9473	9479	GTCCGGGCAAATCCATTAT	CTGGTGAGGTCAATAAGGTC	74
26	(T)7	9631	9637	AGGAATGTGAATTGATGTAGGT	TGGTTTGTGCTTCAATTTGG	166
27	(T)8	9875	9892	CTTTCGATCAAAACGGAAACT	GGTCGTTTACCAATGTCAGT	172
28	(A)8	11212	11291	CTAGCAAAGGCCCTGAATTA	TGAAAACGACGGGTTATTGA	208
29	(A)7	11484	11534	ACACTAATTCTATCTCTATGAC	TCCTTTATTTTGTAAGCTCC	185
30	(AT)7	12029	12042	TATTTATGCGCAACTCTTTA	AGGTGGAATAAATTGCATAG	178
31	(A)7	12359	12365	GAAGTCCAATGGGAGCAATA	TGTTTTGGCCGATCTCAATA	71
32	(A)7	13341	13397	CCAATAATTCCTACGCCCTC	GCTGATCTACCTTATGGCTG	137
33	(A)9	13982	13990	TCCATGAATTGCGTAAAACG	GTTGGGTATTCGGGAATCAA	114
34	(T)8	14340	14398	TTTCTTCTTTTTCTTCTTGC	TCAAATTCAAATGAGTAGCA	153
35	(A)7	14578	14613	TAAAATTGGATTCGGATAGG	TTTAATTTAATGAGGCGTTG	158
36	(T)7	15646	15785	TCCCTTATAATCTTCTCCAA	ATAAGATTAAATCGTGGGTC	281
37	(T)8	15996	16003	ATTCCCATCCAATCCACAAG	TTCACGATTCATCAAGATCAAAAA	71
38	(T)7	16216	16222	GGCCTTAATATCGGTCTTCTT	TTACAATACGCCTAAACGCA	166
39	(T)7	16501	16507	ATGAGTCTTTCTTATCCTCA	TGCCGTATGACTAAAAATAA	190
40	(A)7	16755	16761	GCGTTCCAACAAAATACTCTT	TATCACAAACCCAAGTCAGTAA	108
41	(A)7	16867	16873	ACTGACTTGGGTTTGTGATAA	AAGCAAATCGAGAAAGAATTGAT	164
42	(T)8	16997	17004	ATTCTTTCTCGATTTGCTTCATT	GAATCAATGCCCAGCTTTTT	85
43	(T)9	17303	17311	TCTCTCGAGTTATAAACCCTCT	ATTCGATCTATGGATTGGGC	136
44	(T)7	17432	17629	AGATCGAATTTCAATAGACG	GAACCCATTTTTAAAGAAGTC	312
45	(T)7	17731	17737	AGCTTCCATTCCCAAAACTG	ATCCCCTCAGAAAGATCCAA	85
46	(T)8	18158	18295	CCCAAGCTTCTGCTATTTGT	TTCAAGCAAATGTGCATTCC	240
47	(A)7	19320	19326	AAAGTTGATAAACTCGGTGGA	TAAACAATGGAATCGCCCAT	159
48	(A)7	21331	21337	TACTTGCTCTGCTATTCTGC	ATAGTATTTCCACCCGAATCAG	90
49	(A)7	21647	21653	ACGTGCTCTAATCCTCTGA	TATAGAGAGAGAGGCGCTTT	137
50	(T)8	21806	21813	GGGGTTTCATAATTGGGGTT	CGACGCCAGGATGATAAAAA	124
51	(C)7	23089	23095	CTAGCTCTTCCAGAGTGGTA	CCTGGACAGAAAGACCCTAT	143
52	(C)7	25518	25524	TACCATAGAGGCCAACGATA	GAAGAGTTGCTCTTTGGAGA	89
53	(C)9	25677	25692	TAAGGATTCTTGTGGTTCCG	GAAGGGCAATCACTCATTCT	131
54	(A)8	26905	26912	ATTGATTGCAGCTTTCTCCA	TTCACAGACCAAGAACTACG	117
55	(C)7	27110	27116	AAACCAGTGCTCGAGAGATA	CTTTCTATTCACTCGTGGGAT	118
56	(C)7	27470	27476	CTATGCCAAAAGCGAGAGAA	GGTCGGAACAAGTTGATAGG	115
57	(A)7	29799	29805	AAGAACCCAACTCGGTATTC	GCACAAGAAGAAGAGGTTGA	83
58	(A)7	30774	30809	AAATGGGCCAGATTCTACAG	AACTGGGACCAATTCAGTCA	167
59	(A)7	31986	31992	AAACTGCAAAATCCGATCCA	GACGTAAAACAGATAGCGGA	162
60	(T)9	32638	32646	GTTTGATCCTATTCATGGGGA	CATTCTGTACATGCCAGATCA	125
61	(A)7	34014	34020	ATTCCTCGAAAAGTTAAGGA	TTTCTCTCATTCAAAACCGT	176
62	(T)7	36290	36296	CTTGTTACATGAATCCAATTT	ATTTTTCCGTTTTAATACTCC	152
63	(A)7	36607	36613	AAAGGGCTGATCTTTGAATA	AGACAAGAGATAGATCTTCCA	104
64	(T)7	37174	37180	ATTCTCAACGAGTCCATAAG	ACGATACTTCTTTATCTTTTGA	114
65	(T)9	39867	39875	TCGATTGGTGAAATAGTATC	ATGGACAATTCCTCAATATC	106
66	(A)7	40474	40480	TCTCGGACCTATGAATGG	TGATTGGTCTGAGGTTATC	161
67	(T)7	41052	41058	ATCTATATTGATTGACTGCC	TTTATTGGTTCTACCTCCTA	167
68	(C)7	41311	41317	GATTCAAAATCGTGGTGTAA	GATATGGACAGTTCCAATAAG	116
69	(A)7	42982	42988	GAATTGCGTGAAAGTAAGAT	TTCGAATTTAGAGAGATATTGA	167
70	(A)7	45148	45154	CTGTAGTAAGAGGAGTAGTT	CGACGAAGAATCAAATTATC	166
71	(A)7	45289	45347	GAAAATAGAATTTGTTTCTTCG	GAGTATAGGGGCGGAT	178
72	(A)10	45557	45627	GAGATTTCATCTCTACCATTT	TTGCTATTGCTCCTTTATTAG	249
73	(T)10	47024	47033	TAATTGAGGGCTTGTTATTC	AAATTATCTACTCCATCCGA	334
74	(A)8	47270	47277	TAGTCGGATGGAGTAGATAA	ATGCACTGAGTTTTAGATG	123
75	(T)9	47755	47763	CAAAGTTTTAACACACGAAA	ATATTATCAATCGATTTGTGC	122
76	(A)7	48093	48099	AATAACCCAAAAAGTCGAG	CTCTTCTGATGAATAAATGGA	129
77	(A)7	49118	49124	TGACACATAGTACGATACA	TATAAAGAGTCCGTTGATGA	99
78	(A)9	49287	49384	CAAGATGGTTAGAAATCCTT	GTAGAAAAAGCAGTATATTGATAA	100
79	(T)8	49492	49567	CGTTTAATTAGATCGGGTAA	CATGTCGTATTAATGGAGAA	207
80	(ATT)5	50039	50104	ACAATGACGTCTAAGATAAG	TACTTTATTCAAATGGTGGG	219
81	(A)7	50523	50714	ATTTGTTTGATATACTGTTGTC	TCGCTAATTCAATAATGGTT	535
82	(C)7	51296	51302	CCATTGGGATAGATGTAGA	TTTCTAATTTTCTTGAGCCG	85
83	(A)8	51727	51734	TTGGGTTTAGACATTACTTC	AATTTCGATCAAAAGTGTATC	134
84	(A)8	52100	52107	GAACAGAACAAACGATGTC	GACTTGAAGGATATGGTCG	85
85	(T)9	52432	52440	TTATGAATGGGTAGTTTCTG	GTCCATACCGTTCATATTTA	134
86	(A)16	52702	52747	TTGAACACGATTAAATTTTCG	TCTATCAGAATAAAAGATTGGC	105
87	(T)7	53206	53334	TGAGTTAGTTCAAATCAAAGAA	CAGAATTAAACCGGATACAG	188
88	(A)10	53574	53583	TTTTCGATGAGATCTTGAAT	ATCGAAGCTTTATACTATACG	165
89	(T)7	53700	53763	AGATCACCCCATTTACTAAT	TGAGTCAAGTCTTTCATTAC	249
90	(T)10	53902	53920	ATGAGGTATGTGTGGTATAA	TAGGAATCCGAAGATAAAGA	109
91	(A)8	54131	54138	GATTTTATCTATTCCACATCTTT	TTGTCAATGACTTGGTATTTG	117
92	(T)8	54362	54369	GTTACATTACACAAAAAGCA	AATGGAATAGTGAATTGGAG	149
93	(T)7	54659	54912	CCAATTCACTATTCCATTCA	TACGCCAAAACATAAAATTG	90
94	(T)7	55139	55145	GTCAACGCTCTAATTTTCA	TAAACTATACCCGCTACAAT	223
95	(A)11	55394	55404	AAGATTCGAGGAAGAATAGA	TGGAAGTATTGATCCAATTTA	453
96	(T)7	55813	55819	TCAAACATAAAAGCTGACATA	TATGGAAGATGGATAAATTCC	122
97	(A)9	56318	56326	TGAACAAAAGATGTGACAAT	TTAGAAGACCTCTGTCCTAT	132
98	(AT)6	56604	56662	TAAATGATTTGAATAAGAGACG	CCTTTTGAAAGAAGCTATTC	104
99	(T)10	58265	58286	TCAATACGTTCACGAATAAT	AAATAACCGATTAGTCCTTC	76
100	(T)8	58844	58990	GAAAGTAGATTATCTTTCCA	TTTAAATTTTTGCAATTTGG	346
101	(A)8	59422	59429	AATGCTATGGTTCTTAAATATG	TTGTTTATTTCAAGAATAGGC	125
102	(A)9	59847	59855	AGAATCGGTTACATTTTTCA	TAGGAAGTGTTACAACAAAC	380
103	(T)10	60543	60651	ATTGAACCATCAGAACTACT	ATAGAAGCCCTTCCCTTTAG	127
104	(T)8	60995	61002	AGATTACATACATCTAGTTCG	TACATGTAGATTGATTGTACC	333
105	(T)9	61237	61245	ATTATCTTTTGGTCAATCGT	AAGAATTTTTATGGCATTACTT	239
106	(T)10	61441	61604	AGAATATTCATTGGAGGGG	TATATAGGCGAATCTATGGAG	134
107	(T)12	63313	63324	GATGTTCCAATATCTTCTTGT	CTATTTCAGGGTACCTCC	128
108	(A)8	63484	63491	GGATATTAGCCGTTCATACA	CAGATTTTAACTATTTGCGG	288
109	(T)7	64805	64811	AGTATCTCTTTTCATCGATTC	ATCTAATTGTTTTCAAATGGG	81
110	(T)7	65161	65167	CGAATCAGACCATTTGTATT	GTTTATTGTTGAATTGGGAC	123
111	(T)10	65432	65570	CATATATGATTACGGGTCG	GTAGATACACGAATCACTT	82
112	(A)8	65703	65710	AAAATATGTACTTCTTCGGG	AGGAGTCAAAGAATTTAAGC	94
113	(T)12	66098	66109	GGATATATGAGATTACAACGA	TCTATTTCTAGTCTTTCAGGA	283
114	(T)7	67988	67994	TAAAGAGAAATATGACCAACA	AGATTTATGAGCACTACCTA	78
115	(A)7	68179	68233	GAGCCACAAAGGATTATTTA	TATAATCCATGTAATCGCAG	152
116	(C)10	69626	69717	GAGTTACTACTTTCGTTTCT	ATTCCAAGGTACTTCTTTAC	91
117	(T)10	70043	70102	TTAAAGTCTATATGCGATGG	ATTTATAGTTGTACCTCGTG	156
118	(T)7	72601	72607	TTCATCTCTACTTGGTGATA	TATTGGATCCTTAGCAATTC	290
119	(T)10	73344	73353	AAATTGTTGATAAAACTCCAAA	GGGTTCGAATCTAAGAGAAA	153
120	(A)7	74009	74015	TTAAATCCAGGTATTGTAGAC	ATGATTCGATGAAGAATGAG	124
121	(T)7	74414	74500	TCTGTTCAATGAGATAAGGA	TTTAATAAGTACAAGCCCTC	130
122	(T)8	74822	74883	AAGTTATATTCTGGGGTTTAC	AATTTGAATTCATGAACGAT	105
123	(T)7	75119	75193	AATCGAAGAAATGTATCCAA	AATCAAGCAAGTATCAAGAG	205
124	(A)7	75305	75398	CTTTTTCCCCAGTTCAAATC	TGCTTATAGAATCAAGCAAG	183
125	(T)8	76384	76391	CTAATTGAGTTTGATTCCTCA	TATTGTTGGACAACCACTAT	366
126	(T)7	76538	76544	ATAGACATAGTGGTTGTCC	TTTTAACGTTTGAACCATGA	188
127	(A)7	76724	76730	TACTAATCCTTTTCGAAATCC	AGAATCAAATTGACGAAGG	166
128	(A)7	77866	77872	TTTAGTTCTAAACCCCCTT	ACTTTTTAATGAATTTGATGGA	161
129	(T)8	78249	78256	TATGCTATTTGTTTTGTTCTC	GGATTGTAGTTCAATTGGT	199
130	(T)9	78602	78610	ATATATTTGATATACACACGGA	TTCATATAAGGATCTGGAAGT	117
131	(A)7	78911	78938	TTTGATATACACACGGATATG	AAGGATCTGGAAGTATAAGG	154
132	(A)7	79046	79106	AAGCAAGATCAGAATTTGT	CATGAAATGATAGAACCCC	181
133	(T)9	79569	79577	CCTCTTTCATGATTCCATAG	AGTTTAATTTCCCTTTCTGG	169
134	(A)12	79748	79759	CCTCTTTCATGATTCCATAG	AAAAGGTCCTATACCTCG	145
135	(A)8	79894	79901	TTCTATCTTACACTAAGCCA	CAATAACTTGTTGATCCCTA	363
136	(T)7	80187	80193	TTAATTTCGTTATGATGGGG	ATCTAGTGAGTATAGGATCG	321
137	(A)9	80363	80371	GTAGACTCATAGTGGCTAAT	CTCTACCACTGAGTTAAAAG	77
138	(A)7	80978	81083	ATTCCAATCAAATCCATTCT	ATCGACAAATTCTTACAGAG	168
139	(A)9	81465	81473	TCGATACATGCGATATTTTT	TCCTTAAACTTTCTATGTGTAT	75
140	(T)7	81654	81660	TAAGATTAGTTGATGGAACG	ATTGTCTTGTCTTATGACTC	176
141	(A)7	84100	84106	GAGAAACTATGCGTTTTTG	TTTAAAGAACCTAAAGGAGC	174
142	(A)7	84602	84753	CCCTTTTATGATACTGAGC	GGTAGTAATGGTATCAACTC	130
143	(T)7	84896	84922	GTGTAAATCTATGGGTCTATC	TTATTACCACCTTTGACTTTT	157
144	(A)7	85475	85481	AATATAAGTCCCCAAAATGC	TACAATGTATGGACCCTATT	237
145	(A)8	85773	85802	ATTCTTTCATTTCAGGTTGT	ACAATGTATGGACCCTATT	201
146	(A)10	86062	86137	TAAGTATAGTTGACCGTGAT	TTAGTTCCCAGTTCTTCTAT	398
147	(A)7	87729	87735	TCATTATGAACATAAAGTCCC	GAAGCTATCATATCCCATTTA	441
148	(A)7	89281	89287	ACATTAAACTAAAAGCCCATA	CAGTCTTATGGTTCTTCATTA	240
149	(C)7	89554	89560	TAAAAAGACATGATCCCAAG	TATTGATACTCCTGAAAGGT	77
150	(C)7	89767	89773	CCTAATGGAATAGGTAACAAA	AAACACTCATTCTTTAGCAC	79
151	(A)7	90867	90873	TCACTAGTTATTCCAGATGC	CCAAGAAATATTGAATGGTGA	143
152	(A)10	91813	91887	TCGAAACCCTCTTTTATTAG	AATAGTTTTGTTTGTTGTCC	126
153	(T)8	92398	92405	AGAGTTTCCTACTCATACG	ATCTCTTTTGGTTAACTCG	99
154	(T)8	92986	92993	TTTGGACACGATAGATATGA	AGCTTTAAATAATATGGCCG	223
155	(T)7	93880	93945	TTCACAATAAGCGTAGATTT	TTTTCAATTGTAGCCAATATC	129
156	(A)11	94173	94194	TTTTACTTACCTCTTGTGAG	CAATGAATTAGAACGAATCAA	140
157	(T)11	94354	94453	CTGTACGTACCTATCAAAAA	CCATCTCTCCTACATAATGA	191
158	(T)7	95518	95524	TTTTTACTGGAACGTGATT	TAAGGAGTCTTTATGTCGC	116
159	(A)8	95705	95712	CGGACCTTATTGTATTTGTA	ATAAATTAGAGGAGCTCGAT	85
160	(A)7	95814	95820	GATCGAGCTCCTCTAATTT	GTGAAATCAAAGAATATTGAAAA	134
161	(T)8	96410	96469	TTAGTAAACTACTGGGATCTT	TATTCTTCTCCTTTGCCTT	85
162	(A)9	96594	96602	CAATCCAGATCATAATGAAAG	AATTTGAAATACTCGAACGG	111
163	(A)12	96786	96797	CATCTATATTGAATTGCGGA	GATTCCTATATCGAATCGTG	489
164	(T)10	97533	97542	TGTTTCTCACAGATTCTACT	GGGATACCTTACTCAAAGA	100
165	(T)10	97679	97739	TCTGGTACTGTACTAAAACT	TAGATGACTTGGGTTTATGT	135
166	(A)10	98039	98048	ACTTATCTATCTAGGTGTCTG	ACATTAACATTCGTTTTGAAC	127
167	(T)10	98395	98422	AGAACTCTTTTAGTTCATCC	TCTACAACTCCAGATATTCA	126
168	(A)9	99216	99224	GTAATCGAATCCCAAAGAG	CAAATACAACAAGAGTTCAG	183
169	(T)12	99925	99936	AACTCAATGGAATTCATAACT	CTTATCCTAATTGTTGGTTCA	225
170	(T)8	100441	100448	AATATACCGGATTAGTCGAT	GATGAATCTTGAAACGTGA	257
171	(T)8	101235	101298	CTCGGTAAAACAGATCAAA	CATCTCCTTATCTTTCTGTC	137
172	(T)7	101912	101918	TAAATATTACATGATCCGACAG	ATTTATCATCACAAAGAGAAAC	149
173	(T)9	102215	102238	GTTCAAATCCAATAGTAGGT	TGATTTCGTAACTAGTTTGT	154
174	(C)7	103703	103709	GTTGTTGATCAATTCCATAAT	TGAAACAGGAATTAAAGTAGT	125
175	(T)10	104167	104251	GAGCGTTGTAAATATTAGGC	CTTTGCTATCGAACATTTATT	265
176	(T)9	104678	104686	CTATCGATATATGCCTAGCCT	AAAATATGCAGAGTTCGTC	118
177	(A)7	106657	106663	AAAAGGATTGAGCCGAA	TCCATAGAATTCATTGTGGAC	215
178	(A)7	107005	107068	CGATGTTAATTTGATACAACA	TGCATATAAATCCAATTACCC	77
179	(T)7	107698	107704	CCCACTATGATCCTTACAT	CTGTCACTATAATTGTCAATAC	176
180	(A)	108735	108948	TTCAATCAACAATCAAGTAGA	GTTTGATAGAGGTTTCCTGA	193
181	(A)7	109216	109222	CAAATTTTTCGGGAATTTGTA	TCACCTTTCTACATTAATACAT	136
182	(A)7	109663	109862	AGATATAGATATGATGGGGC	TTACATTTCAGATATTCGCC	236
183	(A)7	110036	110042	ATAGTGCTAGTTGATGAGAG	TCATATTAGATCTAGTTGCATT	139
184	(T)7	110180	110277	AAAACAAGTAATTTCTGCTG	ATCATAACCACTACCTACAT	212
185	(T)10	110678	110695	TACCGATTGAAGTATTTTGAA	AAGACCTCTCTTTCTATCAA	103
186	(A)9	110943	110951	AATTCAAGTACTAACCACTG	GGATAGGTTCTATTACAAGTC	228
187	(A)7	111244	111250	GTTACTAATTGGTGGGATAC	ATTCCTTTATCATTTCGTCC	92
188	(T)7	111879	111885	TTCTACTCATACAAGGGATT	CCTAGTCTAGTATAGTTCCC	88
189	(C)8	112335	112416	CCTTATGATATGCAACTGAA	AAAGTGACTTCGCTATATTT	124
190	(A)7	113028	113034	ATAAAGTTTGTAAAAAGAACCA	ATACATACTATGACTAGGAGG	90
191	(T)9	113166	113174	ATTACTTGTACCTCCTAGTC	TAATGACATAATCATACCGC	230
192	(A)7	113390	113396	TTCTAGGAGAGTTTATTCGT	TCAATACAAGATAAGGGCTA	163
193	(A)7	113537	113745	CTTTTTGATTCTGTTTGTCA	GAACTTCATTGATTCAGAAC	123
194	(T)8	113895	113919	AGATGTTCTGAATCAATGAAG	TAAGTCCCGTTAAGTTCTTT	79
195	(A)7	115498	115504	GATATTATGTGAATGAGCCTA	ACCAAGAATGACCTTATAGTA	390
196	(A)7	115941	115947	AAATTGAAATTTAGGGAAGTG	GGTAGGCATAAAGAGTCTA	158
197	(A)8	116091	116098	TCTACTAGCGGTTTTAACTAT	ATTGAAAATTGACACGGTA	100
198	(T)9	116370	116420	ATATTTACAATACAGACGTGG	CTTAGGTCAAAATTACAATGAA	79
199	(A)8	117003	117063	ATACCTGTATTGTTTTCCAC	GAAATGTACAATGATTCAGC	156
200	(T)7	117350	117356	GGTAGTAAGTACTCTATGGT	TATCTCTAATTTTCGTCACC	153
201	(T)10	117786	117795	AATTTGATTTCGAGTTAGCA	TTGATTTACCCAACTATTCC	289
202	(TA)6	118146	118157	AAAGAAATAAATCGAACCGA	GTTTATTCCTTATCCCGAAA	143
203	(A)9	118641	118665	CAAAGGCGGATTGATATTT	ATATGATAAAGTCGTCAAAATG	87
204	(T)7	119322	119436	CATTTCACATCGAAATAAGAA	AAAAAGTAACCATAGAAACGA	153
205	(T)9	120815	120823	ATACTATGATGGCTCCGTT	AGAAGGCTAATTATGTTATGAA	130
206	(A)11	120967	120977	GCAATAGATTTCCGATAGAT	CGCCATATGAAATATGACTA	136
207	(AT)8	121357	121617	AGTCGGTTGATTAGGATAA	TAAACAGACCAAAACTAATCT	115
208	(T)7	121726	121831	AATCACGATGTCATTTTCTT	ATACATTGAATATTTGGCGG	168
209	(A)7	122305	122311	ACCAATAGGCATTAAATGAA	ATAAACCCATTTTTACGCT	205
210	(A)12	122429	122440	TAGCCTTTATCATAGTTTATCC	CATTCAAAAGACCCATTCTT	185
211	(T)7	122714	122720	CCTCGAGATAATCTACTGAA	CATGGAAATACCCCTTTATC	80
212	(T)8	123508	123515	TATGGGAAATATTGAAACCG	ATAATTCAATCGGGGTAGT	127
213	(T)7	123857	123863	GTTAGGACACCCTATCTTTA	CTACTTGTTCGACACTATAC	105
214	(A)7	125465	125534	ATTTAATATTCAGACCTCGTG	GTGGATCATCACTTATTCAA	113
215	(A)7	127556	127562	AATTCACCTATCCCAATAAC	CCATACCTTTAGCCAATTTA	167
216	(T)7	127939	127945	GGGATTATTAACCGTACCTT	ATCAATAGGTAATGTTGC	196
217	(T)9	128183	128237	AAAGTGAATTCTCCCTAGAT	TTTTCGCATAGAAGACATAA	76
218	(T)7	129338	129344	TTACTTTCTCTCGAACCATA	GATTCGTAGAAGTGGTATAAT	139
219	(T)7	129815	129821	ACAGGTTTTGCCATATTTTA	ACATAAACAAAGACAAGGAT	240
220	(A)9	130085	130093	AACTTTCGAATTGTATCCC	ATAGACTCTGAAACAAGGAT	182
221	(T)7	130402	130408	CTAATGTAGGAGTAGAGTGA	ATGGTAAGCTTTCTTATATCC	156
222	(T)10	130914	130954	TAGTGTCTTTACCCATGATA	TCACGCATATATCTTTAACAA	86
223	(T)10	131428	131531	AATACACATCAATTCTCGG	TTTCAGGATAGGAATGTAAAA	107
224	(T)7	132684	132690	GAGTCAATTTTCTCAGTCTT	GGATAATGTAATAAAGCATCAA	132
225	(T)9	132897	132922	CTTCCATTTATCCGCATTT	TATTGGTTATATCATTGTAGCA	219
226	(T)8	133053	133080	TAGATAATATGAAGCGATGAG	TATTGAGATAATTGCTATGCT	118
227	(T)9	133222	133230	AAGCATAGCAATTATCTCAA	ACTTGTCTTTACGTTCTATC	116
228	(T)7	133779	133785	CTATACATGCAATTCCCTC	AGATTATTCCGAAGGTTTAC	139
229	(T)8	134471	134478	TTACTAATGAACGATAAGCC	ATAGATCTCGTCGTTAAAAG	159
230	(T)9	134763	134821	GCCTTTGTGTTAAGTTTATTT	CGCCGTAGTAAATAGGATA	110
231	(T)7	134956	134962	CGACGAAGAATCAAATTATC	CTGTAGTAAGAGGAGTAGTT	90
232	(T)7	137122	137128	TTCGAATTTAGAGAGATATTGA	GAATTGCGTGAAAGTAAGAT	166
233	(G)7	138793	138799	TATTTCATCTATTTCGTGACC	GTGAATATATCCGCCATTT	166
234	(A)7	139052	139058	TTTATTGGTTCTACCTCCTA	ATCTATATTGATTGACTGCC	167
235	(T)7	139630	139636	TTTGTCTAAGTCACTTCCT	AATTCATAGATGTGGATCTCG	97
236	(A)9	140235	140243	ATGGACAATTCCTCAATATC	TCGATTGGTGAAATAGTATC	167
237	(A)7	142930	142936	ACGATACTTCTTTATCTTTTGA	ATTCTCAACGAGTCCATAAG	147
238	(T)7	143497	143503	TAGATCTTCCAAAGAACAAG	AAGAATTCTCGATGTGAAAA	106
239	(A)7	143814	143820	ATTTTTCCGTTTTAATACTCC	CTTGTTACATGAATCCAATTT	114
240	(T)7	146090	146096	TTTCTCTCATTCAAAACCGT	ATTCCTCGAAAAGTTAAGGA	123
241	(A)9	147464	147472	AGATCATGAATTAGTAACTGC	AGGTTTGATCCTATTCATGG	152
242	(T)7	148118	148124	TTTTCATAGCTCGATAGATAAT	TCCGATCCAATTTATCGTAAT	176
243	(T)7	149301	149336	TAACTGGGACCAATTCAG	ATTCTACAGGATCAAACCTA	112
244	(T)7	150305	150311	GGGATTACCATTATCCTTTT	ATAAAGCAGGTTTTACATGA	106
245	(G)7	152634	152640	TGAAGTAAGACTAAGCTCAT	ATCCCTCTCTTTCCTTTTT	157
246	(G)7	152994	153000	GATCCAACTTTCTATTCACT	ATAGCTGTCCATATACTGAT	181
247	(T)8	153198	153205	ACCTAACAACGTATCTTCAC	TAGGAAAATCCTATTGATTGC	125
248	(A)7	154418	154433	CATTCTTAAAACCAGCATTC	GAATCCCATTCTAACTAAGG	108
249	(G)7	154586	154592	AGTACGATGAAAGTTGTAAG	GACTGATTCTACCATAGAGG	144
250	(G)7	157015	157021	ACAGAAAGACCCTATGAAG	ATAGAAACTGTCTACCTGAG	132
251	(A)8	158297	158304	TAAAAAGCTTAACACCTCTC	AATTGGGGTTTTGAATAAGA	74
252	(T)7	158457	158463	TCACATCTTCTTAACCCG	TAGCCACGTGCTCTAATC	199
253	(T)7	158773	158779	ATAGTATTTCCACCCGAATC	CTAATACTTGTACTTGCTCTG	94
254	(A)7	160968	160974	ATACATGTCAAAGTGATGGA	GCCGAATTTCTTCTTATCT	123

## Sheet: Supplementary_Table_S2
Supplementary Table S2. The PCR primers designed to amplify SSR in structurally functional genes in the curly birch cpDNA (EST-cpSSR markers)
№	Gene	Forward primer	Reverse primer	Length, bp
1	psbA	TAAGTTCCCACTCACGACCC	GAAAGCGAAAGCCTATGGGG	376
2	matK	TCGAGCTTCTTGGGAGCATT	TCTCCAAGCATTCCCTCGAC	121
3	rps16	ACAGTTCCCGTAGGTTGAGC	TGGGCGGTTTATCGAATCGT	161
4	psbK	TCTGTATCCGGTTTAATTCTG	GAAAACTTACAGCAGCTTGCC	159
5	psbI	TCTTTGTTTCTCTCTTTATCTT	TATTCTTCACGTCCAGGATTACG	70
6	atpA	AGCAACTCGCGTAATCGTTG	CAATCGGGAGATGTTTCGGC	296
7	atpF	GTTGGAAAACCCGTTGTCGG	CCGGGCACGTTTAAGGAAAG	197
8	atpH	AAAGCGCTAAGGCTACAACT	GGCCAAGCTGTAGAAGGGAT	127
9	atpI	TGACCCTCCATAGATTCGCC	GGGAATTAGCCGCACCTACA	364
10	rps2	ATATCTGCGAGATCGGGGTC	AACCGTCTTCCGAAACGAGA	215
11	rpoC2	GCTCGTTCCAACCCTCAATC	TATTTGGCCACTCTGGGAGC	205
12	rpoC1	ATGATCGGTCTCAACTCGGG	CCCCGGGTAATGAATGGGAA	160
13	rpoB	ATATCGCCCGTCTCTACCCA	TTGGTGGCGAACTTGCTTTG	277
14	petN	AGTAAGTCTCGCTTGGGCTG	AGTCCACTTCTACCCCAGACT	78
15	psbM	AGAATGAACAGTGCAGTAGC	GATTAAATCCCGAGTTATTGCGA	97
16	psbD	TCATATGATGGGGGTTGCCG	GTCATAGGCGCGTAGGTTCA	304
17	psbC	ACCAAACCTTTTGCATGGGC	AGTCGGCGAACGCATTAGAT	279
18	psbZ	TCCAATTGGCTGTTTTTGCAT	ACTCGACCAACCATCAGGAG	92
19	rps14	TGTGTCCGGATAGCCCAAAG	ATCCCCACCGCGTAATAGTG	101
20	psaB	ATGTCCTGTCCAAGCCAAGG	CCTCATTTTGGTCAACCGGC	300
21	psaA	ACATGCCACTCAGCCAAAGА	TCGCCGGAACCAGAAGTAAA	253
22	ycf3	CGAAACGCCTTGTGATCTTCA	TTCGATCAAGCCGCTGAGTA	97
23	rps4	TGGGGTTTGCAGCGATAACT	CCTAAAGCCGGAAGCGATCT	323
24	ndhJ	CCGCACTTTTCCAAACCCAG	GTTTGTCTGCTTGGCTCGTC	312
25	ndhK	TTCCGGTTTAGGTGGACAGC	CTCTCCAGTTTATGGCCGCT	342
26	ndhC	CGCCATGCATAAACTGAACCA	TAGAACCAATGGGCGATGCT	196
27	atpE	TACTCGTGTCCTAGCTCGTCT	TGATGCGGAGAAGGGTAGTG	142
28	atpB	AGCCTTCGCAGTAGCTTCAT	ACCGTAGCAAGAGCACGAAA	204
29	rbcL	AACTGTGTGGACCGATGGAC	CCACCGCGGAGACATTCATA	387
30	accD	GGCGAGAAAATCACCCGTTT	ATGTAGGCATTGGGTTCAGCA	263
31	psaI	CCCTCGATTTTGGTGCCTTT	АCATGAAGAAATAAAGAAGCC	71
32	ycf4	GCGGGGTCTCGAAAAACAAG	CCCGCAATCCCGTAGAAAGA	179
33	cemA	GGTGGGATACTAGGCAATCC	AAGCTTTTGGTGTGTCGCTT	342
34	petA	GAGGTTCCACAAGCGGTACT	TTACTCTTGCTACCGTCGGG	401
35	psbJ	ACCCAATCCGGAATATGAACC	GGCCGATACTACTGGAAGGATT	109
36	psbL	AGTAATAACCCCCAGTAGAG	TGACACAATCAAACCCGAACG	70
37	psbF	GCATTGCAGATATTGACCCCA	TTACAGTGCGATGGTTGGCT	75
38	psbE	GTTCCAAAGGATCAAAACGG	CGGGTTGGTTATTCGTCAGC	126
39	petL	TCGGTTTTCTACTAGCGGTTT	AAGAATTGAAAATTGACACGGT	169
40	petG	ATTTGGAATTGTCTTAGGTCT	AAAGGTCCAACTGATCGCCA	99
41	psaJ	ACATATCTCTCCGTGGCACC	CAACGCATCTGGGAATAAACGA	96
42	rp133	TAGTGCTAATCGAAATGGTG	TCTCCCCATGAATTGTATGTTT	149
43	rps18	AGCGATCTTTTCGTAGGCGT	GTGGTCGACTCACCTCTTTCA	238
45	rps 12	AGTACATGTTCCTCGTCGCT	ACAGCCAATCAGAAATGTCACG	70
46	clpP	AAACCCTTGTGATGGTTTCGC	TATGAGGCACAAACGGGAGAA	76
47	pabB	ATCCGGGTCGTTTGCTTTC	GCCACACCTTCGTAACTCCA	247
48	psbT	TGGAAGCATTGGTTTATACA	ACTTTAGGCGGTTCCCGAAA	85
49	psbN	CGTGTTCCTCGAATGGGTCT	ACAGCAACCTTAGTTGCCATC	118
50	psbH	GGCTACACAAACCGTTGAGG	AGCCATTGCGATACCCATCA	142
51	petB	TTCATCGATGGTCGGCAAGT	CTACACTAGCACTTCCGCGT	273
52	petD	GCGGATCCATTTGCAACTCC	CAGTTGTCGCTACTGGACGA	199
53	rpoA	GACACAAATAGACGCGCCAC	GCGAAGAGCTTTGCTTGGAG	184
54	rps11	ACCACTTCTACGAATCGCCC	TACAAGGAGAGGGACACCGT	151
55	rp136	TGTCTCGGGTTGGAACAAAT	AAGGGCCTCTGTTCGTAAAA	87
56	infA	CGCCGAATCCTTCCTGAAC	AGAAGAAAAATGGATTCGTGG	117
57	rps8	CGGGTCGACTGATCCGTTT	AAAGGGAACGGTTCGAATACCA	197
58	rp114	TAACAACCGCAGCATTGTCAT	TTAAATGTAGCGGACAACAGCG	238
59	rp116	TCTGCTACTCCGCCCATTTC	CCCGCGTGGATCACATCTAA	218
60	rps3	TCGACACGCGCAATTTCTTT	GAAGGTCGGCCTCGAAGAAT	275
61	rp122	TTTGTCCCATAATCCCCCGA	AAGTGGAAGTCAACGAGGGT	242
62	rps19	TCATTTTTGGCGTGTCCTCG	GTAACTTGGTCCCGAGCGT	167
63	rp12	GGACGCTTACCTAGCCAACA	GCAAAAGAGGGGAAATCGGC	158
64	rp123	CCCGGGAGTCGATGACTATT	TGTCGAATCGGGATCAACTAGG	96
65	ycf2	ACCGTGCAGTACCAGACAAG	GGATCTGCAGGGTCCCAAAT	86
66	ndhB	TCGCACGTGAGGGGTTATTT	GGACTCCTTACGAGCGTTGT	96
67	rps 7	ACTTGATGAGTCGATCCGCC	ATGTCACGTCGAGGTACTGC	260
68	rps12	TCCGACAGCATCTAGGGTTC	GCCAGAGTACGCTTAACCTC	162
69	16S rRNA	GGGGAATTTTCCGCAATGGG	AGCCGATGCTTATTCCCCAG	127
70	23S rRNA	TGTACCCGAAACCGACACAG	GATCGTTACGCCTTTCGTGC	326
71	4.5S rRNA	CGAGACGAGCCGTTTATCAT	CTACCGGTCTGTTAGGATGCC	84
72	5S rRNA	TCCTAGGCGTAGAGGAACCA	TCCTGGCGTCGAGCTATTTT	110
73	ycf1	GTCGTTGTGGTCGGACTCTAT	ACGGTAGGGCTAGGACAGTT	226
74	ndhF	AAACAGGCAAGGGGTGGAAT	TTGGGTCTTATCGAGCTGCTT	235
75	rp132	TGGAAAATGGAGGGGTATTG	TTTGAATTCCCTGTAGAAAGCG	75
76	ccsA	GGTATTGGGCTATGCAGCTCT	GCCTCATTTGCCCATACTGC	303
77	ndhD	AACTCTCGCGGTCCAGAATC	TATCTCGACGAAATGGGCGG	308
78	psaC	GGACAGGCGGATTCACATCT	GTACTCAATGTGTCCGAGCCT	136
81	ndhE	TAGCTGGTCCAATAGCTGCTT	AGAGCCCTTATGTGTCTTGAACT	154
82	ndhG	CCCATCTCCAACGGTCCAAA	GCCCGGACCGATACATGATT	286
83	ndhI	GGTAAACGACCCAAGGCAAT	ACGTTTCCGCGGTCGAATA	285
84	ndhA	TCCAACCGCCCAAGTAAAGA	GAATTTGTGGCGGCAACCT	221
85	ndhH	TATCTGCCATAAAGGGGCCG	ATGCATGGGGTTCTTCGACT	310
86	rps15	CGTTGCCGTTTTCCCAGAAT	AGAAGAAAACAGGGGATCCGT	141
